# Supplementary material for: Combined Effect of Sarcopenia and Systemic Inflammation on Survival in Patients with Advanced Stage Cancer Treated with Immunotherapy
Source: PubMed Central journal article supplement — Oncologist. 2019 Dec 5;25(3):e528–35. doi: 10.1634/theoncologist.2019-0751 (PMC7066707; doi:10.1634/theoncologist.2019-0751), 2019-12-05
Supplement: ONCO-25-e528-s001.pdf [file ONCO-25-e528-s001.pdf]

Supplemental Tables for:  
Combined effect of sarcopenia and systemic inflammation on survival in advanced stage cancer patients treated with immunotherapy  
Mehmet Bilen et al.

**Supplemental Table S1:** UVA and MVA<sup>a</sup> of NLR-based risk groups and survival

|                                                                            | UVA                     |                              |                         |                              | MVA                   |                              |                          |                              |
|----------------------------------------------------------------------------|-------------------------|------------------------------|-------------------------|------------------------------|-----------------------|------------------------------|--------------------------|------------------------------|
|                                                                            | OS                      |                              | PFS                     |                              | OS                    |                              | PFS                      |                              |
|                                                                            | HR (CI)                 | p-value                      | HR (CI)                 | p-value                      | HR (CI)               | p-value                      | HR (CI)                  | p-value                      |
| <b>Group 1: Low Risk</b><br>NLR < 4.6 and<br>Non-Sarcopenic<br>(n=25)      | --                      | --                           | --                      | --                           | --                    | --                           | --                       | --                           |
| <b>Group 2: Intermediate Risk</b><br>NLR < 4.6 and<br>Sarcopenic<br>(n=28) | 1.69<br>(0.81-<br>3.50) | 0.161                        | 1.53<br>(0.86-<br>2.72) | 0.151                        | 4.71 (1.90-<br>11.67) | <b>&lt;0.001<sup>b</sup></b> | 1.96<br>(1.05-<br>3.67)  | <b>0.034<sup>b</sup></b>     |
| <b>Group 3: High Risk</b><br>NLR ≥ 4.6 and<br>Non-Sarcopenic<br>(n=10)     | 2.84<br>(1.18-<br>6.82) | <b>0.020<sup>b</sup></b>     | 3.33<br>(1.53-<br>7.27) | <b>0.003<sup>b</sup></b>     | 4.33 (1.60-<br>11.73) | <b>0.004<sup>b</sup></b>     | 4.16<br>(1.81-<br>9.60)  | <b>&lt;0.001<sup>b</sup></b> |
| <b>Group 4: Very High Risk</b><br>NLR ≥ 4.6 and<br>Sarcopenic<br>(n=16)    | 4.19<br>(1.91-<br>9.20) | <b>&lt;0.001<sup>b</sup></b> | 4.60<br>(2.31-<br>9.16) | <b>&lt;0.001<sup>b</sup></b> | 6.53 (2.23-<br>19.14) | <b>&lt;0.001<sup>b</sup></b> | 4.43<br>(1.86-<br>10.52) | <b>&lt;0.001<sup>b</sup></b> |

<sup>a</sup>The multivariable model was built by controlling for gender, checkpoint indication, number of previous treatment lines, Royal Marsden Hospital (RMH) risk group, age, ECOG PS, race, number of metastatic sites, and histology

<sup>b</sup>Statistical significance at alpha < 0.05

**Supplemental Table S2:** UVA and MVA<sup>a</sup> of MLR-based risk groups and survival

|                                                                             | UVA                      |                              |                         |                              | MVA                    |                              |                         |                          |
|-----------------------------------------------------------------------------|--------------------------|------------------------------|-------------------------|------------------------------|------------------------|------------------------------|-------------------------|--------------------------|
|                                                                             | OS                       |                              | PFS                     |                              | OS                     |                              | PFS                     |                          |
|                                                                             | HR (CI)                  | p-value                      | HR (CI)                 | p-value                      | HR (CI)                | p-value                      | HR (CI)                 | p-value                  |
| <b>Group 1: Low Risk</b><br>MLR < 0.38 and<br>Non-Sarcopenic<br>(n=16)      | --                       | --                           | --                      | --                           | --                     | --                           | --                      | --                       |
| <b>Group 2: Intermediate Risk</b><br>MLR < 0.38 and<br>Sarcopenic<br>(n=14) | 1.46<br>(0.52-<br>4.09)  | 0.468                        | 1.60<br>(0.74-<br>3.46) | 0.235                        | 3.51 (0.94-<br>13.06)  | 0.061                        | 1.65<br>(0.71-<br>3.81) | 0.243                    |
| <b>Group 3: High Risk</b><br>MLR ≥ 0.38 and<br>Non-Sarcopenic<br>(n=19)     | 3.03<br>(1.26-<br>7.32)  | <b>0.014<sup>b</sup></b>     | 2.91<br>(1.38-<br>6.11) | <b>0.005<sup>b</sup></b>     | 3.45 (1.17-<br>10.22)  | <b>0.025<sup>b</sup></b>     | 2.16<br>(0.99-<br>4.71) | 0.054                    |
| <b>Group 4: Very High Risk</b><br>MLR ≥ 0.38 and<br>Sarcopenic<br>(n=30)    | 4.63<br>(1.97-<br>10.87) | <b>&lt;0.001<sup>b</sup></b> | 3.50<br>(1.78-<br>6.88) | <b>&lt;0.001<sup>b</sup></b> | 10.70 (3.45-<br>33.14) | <b>&lt;0.001<sup>b</sup></b> | 2.91<br>(1.41-<br>6.00) | <b>0.004<sup>b</sup></b> |

<sup>a</sup>The multivariable model was built by controlling for gender, checkpoint indication, number of previous treatment lines, Royal Marsden Hospital (RMH) risk group, age, ECOG PS, race, number of metastatic sites, and histology

<sup>b</sup>Statistical significance at alpha < 0.05
